# Supplementary material
Source: HighWire-hosted journal article supplement (https://erj.ersjournals.com/content/61/1/2201723)
Supplement: inline-supplementary-material-1 [file inline-supplementary-material-1.pdf]

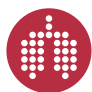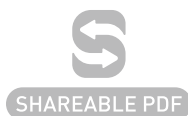

# How do we enhance protective immunity to COVID-19 in lung transplant recipients?

David W.J. Griffin<sup>1</sup> and James H. McMahon<sup>1,2</sup>

<sup>1</sup>Department of Infectious Diseases, Alfred Hospital and Monash University, Melbourne, Australia. <sup>2</sup>Department of Infectious Diseases, Monash Health, Clayton, Australia.

Corresponding author: David W.J. Griffin ([d.griffin@alfred.org.au](mailto:d.griffin@alfred.org.au))

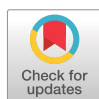

Shareable abstract (@ERSpublications)

**A more nuanced understanding of the immunological factors protecting lung transplant recipients from COVID-19 infection and severe disease are urgently required, including the roles for additional booster doses and immunosuppression modification** <https://bit.ly/3C8dOlq>

**Cite this article as:** Griffin DWJ, McMahon JH. How do we enhance protective immunity to COVID-19 in lung transplant recipients? *Eur Respir J* 2023; 61: 2201723 [DOI: 10.1183/13993003.01723-2022].

This single-page version can be shared freely online.

Copyright ©The authors 2023.  
For reproduction rights and  
permissions contact  
[permissions@ersnet.org](mailto:permissions@ersnet.org)

Received: 2 Sept 2022  
Accepted: 16 Sept 2022

The COVID-19 pandemic has had a multifaceted impact on the care and health of immunocompromised individuals, including solid organ transplant (SOT) recipients [1]. Lung transplant recipients are particularly vulnerable, with rates of severe disease, hospitalisation and death due to COVID-19 exceeding those of the immunocompetent population and other transplant groups [2]. However, the lung transplant group is heterogeneous and intersects with other populations at risk of severe disease, including the elderly, and those with intercurrent comorbid disease and other immunocompromising conditions [2]. Although SOT recipients were relatively underrepresented in early waves of the COVID-19 pandemic due to behaviour modification, physical distancing and masks, a growing number are now experiencing COVID-19 infection. Prevention of COVID-19 in this group is increasingly important. Given immunisation is a key component of COVID-19 prevention, there is a pressing need to better understand vaccine responses in lung transplant recipients.
